# Supplementary material
Source: HighWire-hosted journal article supplement (https://jnm.snmjournals.org/highwire/filestream/94246/field_highwire_adjunct_files/0/jnm079947_Suppl_tables_and_fig.pdf)
Supplement: jnm079947_Suppl_tables_and_fig.pdf [file jnm079947_Suppl_tables_and_fig.pdf]

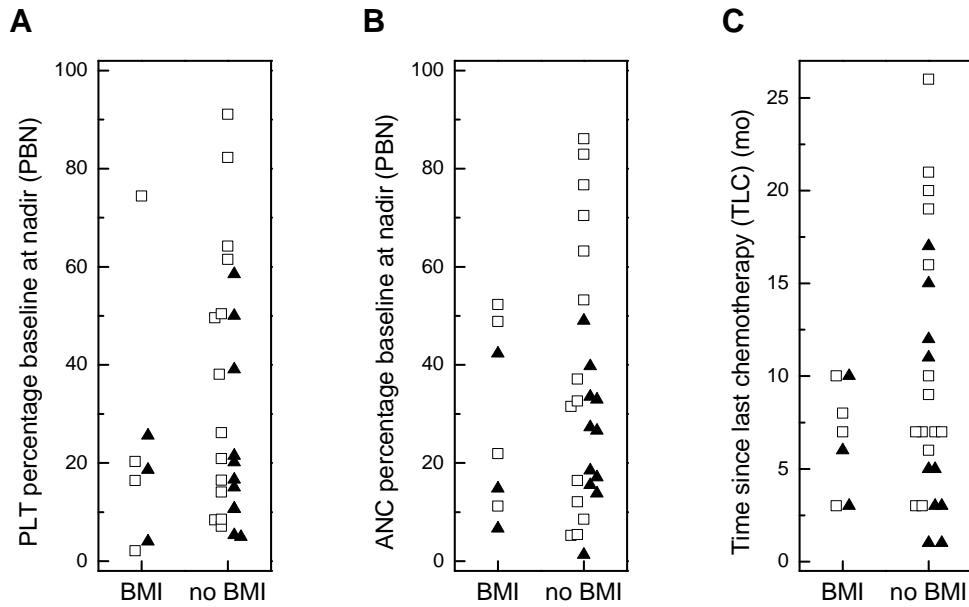

**Supplemental Figure 1.** (A) PBN for platelets, (B) PBN for neutrophils and (C) TLC with respect to the patient group with bone marrow involvement (BMI) and the patient group without bone marrow involvement (no BMI). Patients were treated with  $^{90}\text{Y}$ -ibritumomab tiuxetan (▲) or  $^{131}\text{I}$ -tositumomab (□).

**Supplemental Table 1.** Actual and predicted platelet count as well as actual and predicted thrombocytopenia grade. Patients # 1 to 18 were treated with <sup>131</sup>I-tositumomab and patients # 19 to 32 were treated with <sup>90</sup>Y-ibritumomab tiuxetan. Both variables, TLC and BSL, used in the toxicity prediction model are reported as well.

| Patient # | Time since last chemotherapy in months (TLC) | Platelet count ( $\cdot 10^3$ per mm <sup>3</sup> ) |                 |                    | Thrombocytopenia grade |                    |
|-----------|----------------------------------------------|-----------------------------------------------------|-----------------|--------------------|------------------------|--------------------|
|           |                                              | Baseline (BSL)                                      | Actual at nadir | Predicted at nadir | Actual at nadir        | Predicted at nadir |
| 1         | 7                                            | 197                                                 | 75              | 46                 | 2                      | 3                  |
| 2         | 21                                           | 213                                                 | 194             | 132                | 1                      | 1                  |
| 3*        | 3                                            | 195                                                 | 4               | 24                 | 4                      | 4                  |
| 4         | 7                                            | 220                                                 | 31              | 54                 | 3                      | 2                  |
| 5         | 3                                            | 416                                                 | 35              | 50                 | 3                      | 3                  |
| 6         | 19                                           | 137                                                 | 68              | 84                 | 2                      | 1                  |
| 7         | 20                                           | 104                                                 | 64              | 66                 | 2                      | 2                  |
| 8*        | 10                                           | 182                                                 | 37              | 61                 | 3                      | 2                  |
| 9         | 26                                           | 79                                                  | 65              | 64                 | 2                      | 2                  |
| 10        | 7                                            | 85                                                  | 3               | 21                 | 4                      | 4                  |
| 11        | 3                                            | 67                                                  | 14              | 8                  | 4                      | 4                  |
| 12        | 16                                           | 190                                                 | 122             | 95                 | 1                      | 1                  |
| 13        | 7                                            | 260                                                 | 22              | 64                 | 4                      | 2                  |
| 14        | 10                                           | 164                                                 | 43              | 55                 | 3                      | 2                  |
| 15        | 6                                            | 123                                                 | 62              | 24                 | 2                      | 4                  |
| 16*       | 8                                            | 159                                                 | 26              | 44                 | 3                      | 3                  |
| 17*       | 7                                            | 246                                                 | 183             | 55                 | 1                      | 2                  |
| 18        | 9                                            | 266                                                 | 44              | 81                 | 3                      | 1                  |
| 19        | 15                                           | 106                                                 | 62              | 50                 | 2                      | 3                  |
| 20        | 1                                            | 114                                                 | 6               | 7                  | 4                      | 4                  |
| 21        | 12                                           | 208                                                 | 104             | 80                 | 1                      | 1                  |
| 22*       | 10                                           | 177                                                 | 7               | 60                 | 4                      | 2                  |
| 23        | 3                                            | 198                                                 | 21              | 24                 | 4                      | 4                  |
| 24*       | 3                                            | 237                                                 | 44              | 27                 | 3                      | 3                  |
| 25*       | 6                                            | 535                                                 | 137             | 111                | 1                      | 1                  |
| 26        | 5                                            | 388                                                 | 78              | 69                 | 1                      | 2                  |
| 27        | 11                                           | 177                                                 | 38              | 65                 | 3                      | 2                  |
| 28        | 1                                            | 261                                                 | 28              | 14                 | 3                      | 4                  |
| 29        | 17                                           | 138                                                 | 54              | 77                 | 2                      | 1                  |
| 30        | 3                                            | 247                                                 | 37              | 29                 | 3                      | 3                  |
| 31        | 3                                            | 259                                                 | 43              | 30                 | 3                      | 3                  |
| 32        | 5                                            | 187                                                 | 9.1             | 35                 | 4                      | 3                  |

\* Patient with presence of bone marrow involvement (BMD)

**Supplemental Table 2.** Actual and predicted ANC as well as actual and predicted neutropenia grade. Patients # 1 to 18 were treated with <sup>131</sup>I-tositumomab and patients # 19 to 32 were treated with <sup>90</sup>Y-ibritumomab tiuxetan. Both variables, TLC and BSL, used in the toxicity prediction model are reported as well.

| Patient # | Time since last chemotherapy in months (TLC) | ANC per mm <sup>3</sup> |                 |                    | Neutropenia grade |                    |
|-----------|----------------------------------------------|-------------------------|-----------------|--------------------|-------------------|--------------------|
|           |                                              | Baseline (BSL)          | Actual at nadir | Predicted at nadir | Actual at nadir   | Predicted at nadir |
| 1         | 7                                            | 5,590                   | 4,290           | 1,500              | 1                 | 2                  |
| 2         | 21                                           | 4,720                   | 3,910           | 2,740              | 1                 | 1                  |
| 3*        | 3                                            | 1,530                   | 800             | 260                | 3                 | 4                  |
| 4         | 7                                            | 3,290                   | 170             | 960                | 4                 | 3                  |
| 5         | 3                                            | 2,460                   | 210             | 480                | 4                 | 4                  |
| 6         | 19                                           | 2,370                   | 1,260           | 1,360              | 2                 | 2                  |
| 7         | 20                                           | 2,230                   | 1,920           | 1,230              | 1                 | 2                  |
| 8*        | 10                                           | 4,830                   | 540             | 1,760              | 3                 | 1                  |
| 9         | 26                                           | 3,180                   | 2,240           | 2,370              | 1                 | 1                  |
| 10        | 7                                            | 1,860                   | 100             | 550                | 4                 | 3                  |
| 11        | 3                                            | 1,885                   | 700             | 340                | 3                 | 4                  |
| 12        | 16                                           | 3,230                   | 2,040           | 1,580              | 1                 | 1                  |
| 13        | 7                                            | 4,690                   | 770             | 1,360              | 3                 | 2                  |
| 14        | 10                                           | 2,540                   | 800             | 910                | 3                 | 3                  |
| 15        | 6                                            | 5,220                   | 1,700           | 1,350              | 1                 | 2                  |
| 16*       | 8                                            | 4,720                   | 1,030           | 1,470              | 2                 | 2                  |
| 17*       | 7                                            | 4,080                   | 1,990           | 1,130              | 1                 | 2                  |
| 18        | 9                                            | 5,370                   | 648             | 1,820              | 3                 | 1                  |
| 19        | 15                                           | 4,010                   | 1,590           | 1,920              | 1                 | 1                  |
| 20        | 1                                            | 3,350                   | 44              | 520                | 4                 | 3                  |
| 21        | 12                                           | 2,630                   | 880             | 1,070              | 3                 | 2                  |
| 22*       | 10                                           | 2,579                   | 170             | 940                | 4                 | 3                  |
| 23        | 3                                            | 3,260                   | 1,070           | 590                | 2                 | 3                  |
| 24*       | 3                                            | 3,370                   | 500             | 650                | 4                 | 3                  |
| 25*       | 6                                            | 7,550                   | 3,200           | 1,930              | 1                 | 1                  |
| 26        | 5                                            | 11,080                  | 1,530           | 2,680              | 1                 | 1                  |
| 27        | 11                                           | 2,220                   | 343             | 860                | 4                 | 3                  |
| 28        | 1                                            | 2,500                   | 665             | 330                | 3                 | 4                  |
| 29        | 17                                           | 4,240                   | 2,080           | 2,230              | 1                 | 1                  |
| 30        | 3                                            | 4,250                   | 786             | 810                | 3                 | 3                  |
| 31        | 3                                            | 5,050                   | 1,380           | 930                | 2                 | 3                  |
| 32        | 5                                            | 3,710                   | 634             | 890                | 3                 | 3                  |

\* Patient with presence of bone marrow involvement (BMD)
